# Supplementary material
Source: Springer Nature journal article supplement (https://www.springermedizin.de/resource/supplementary/13012_2011_532_MOESM7_ESM.pdf/9630068)
Supplement: MOESM7 [file 9630068]

# OUTCOMES

## 1. Change Agency

1. What impact do the characteristics of the change agent have on evidence-informed healthcare?
2. What is the overall impact of the change agent intervention on evidence-informed healthcare?
3. What impact does the interaction between the change agent and the setting have on evidence-informed healthcare?

## 2. Systems change

Systems change interventions  
Interplay between setting and interventions

## DOSE

## LEVELS

Theory &  
Contextual  
Factors

## 3. Technology

Effect of organizational  
characteristics on  
interventions used  
Effect of technological  
interventions

## 4. Education and Learning

Impact of education  
interventions  
Participatory versus non-  
participatory education  
interventions
